# Supplementary material for: An ionic polymer–metal nanocomposite sensor using the direct attachment of an acidic ionic liquid in a polymer blend
Source: Royal Society of Chemistry journal article supplement (doi:10.1039/c9tc02355k), 2019-01-01
Supplement: c9tc02355k1.pdf [file c9tc02355k1.pdf]

## Electronic Supplementary Information

### Ionic polymer-metal nanocomposite sensor using the direct attachment of acidic ionic liquid in a polymer blend

VarijPanwar\*<sup>a</sup> and Gopinathan Anoop<sup>b</sup>

<sup>a</sup>Department of Electronics and Communication Engineering, Graphic Era Deemed to be University, Dehradun

<sup>b</sup>School of Materials Science and Engineering, Gwangju Institute of Science and Technology Oryong-Dong, Buk-Gu, Gwangju 61005, South Korea.

\*E-mail: [variipanwarcertain@gmail.com](mailto:variipanwarcertain@gmail.com)

### Synthesis of IPMNC (Electro-less deposition)

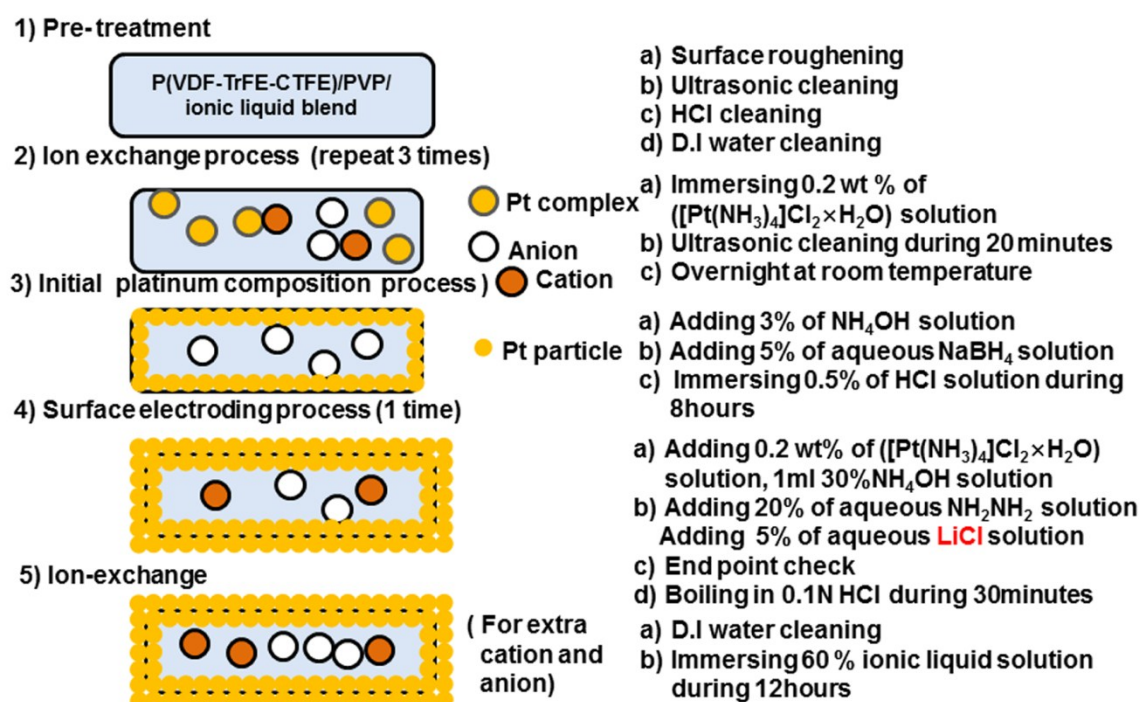

Fig.S1Fabrication of IPMNC

Fig.S1 shows the fabrication method of IPMNC using ionic liquid embedded P (VDF-TrFE-CTFE)/PVP membrane using electroless deposition method.

## Bending machine

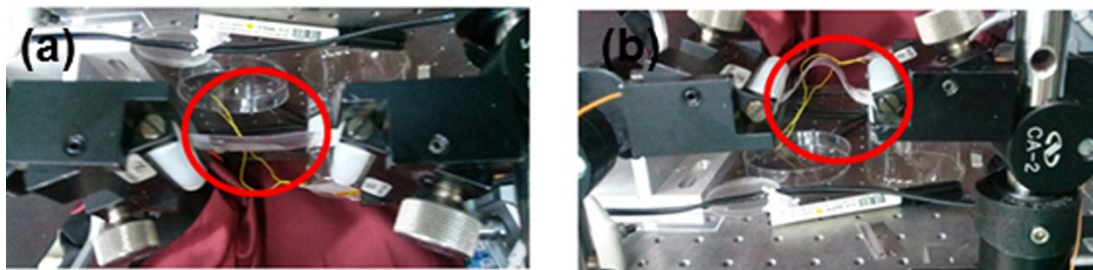

Fig. S2 (a) Clamping of IPMNC sample (a) without bending state (b) bending state

Fig. S2 (a) shows the IPMNC sample without bending state. Fig. S2 (b) shows the IPMNC sample with a bending state.

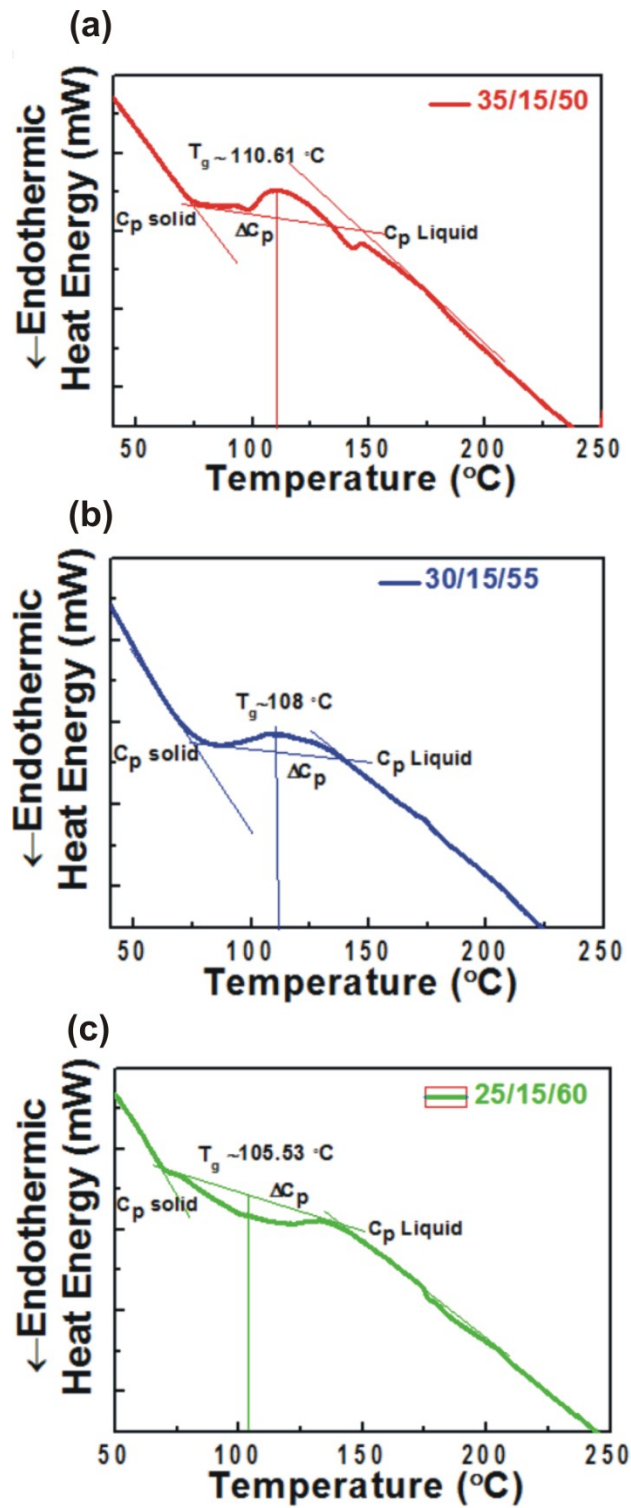

Fig. S3 DSC spectra for estimation of  $T_g$  of 35/15/50, 30/15/55, and 25/15/60.

Fig. S3 shows the DSC spectra for estimation of  $T_g$  of 35/15/50, 30/15/55, and 25/15/60. To calculate the  $T_g$  of the blend, the transient between  $C_{p_{solid}}$ ,  $C_{p_{liquid}}$ , and lines tangential to the  $C_{p_{solid}}$ ,  $C_{p_{liquid}}$  were drawn. The  $T_g$  onset and  $T_g$  end-set are determined using intersections between  $C_{p_{solid}}$ ,  $C_{p_{liquid}}$ , and transient respectively. The  $T_g$  of the blend is estimated as a midpoint of the segment between  $T_g$  onset and  $T_g$  end-set.

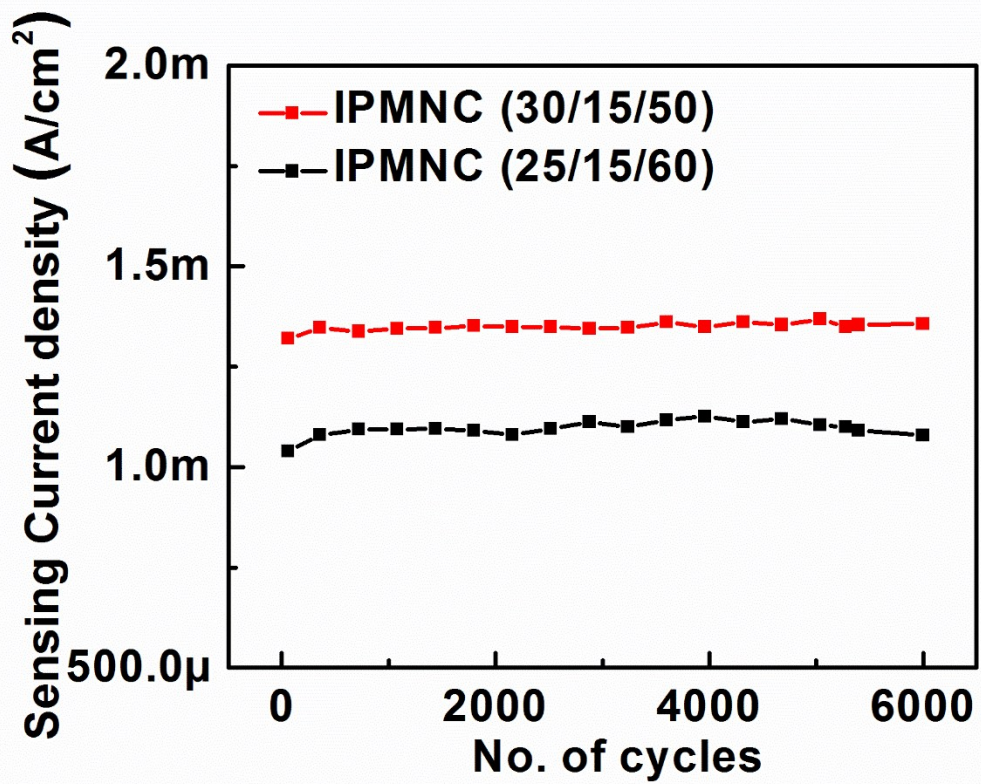

Fig. S 4 The sensing current of the IPMNC using 30/15/55 and 25/15/60 blends with a number of cycles at bending strain of 0.009

The sensing current of the IPMNC using 30/15/55 and 25/15/60 blends with a number of cycles bending strain of 0.009 is shown in Fig. S3.

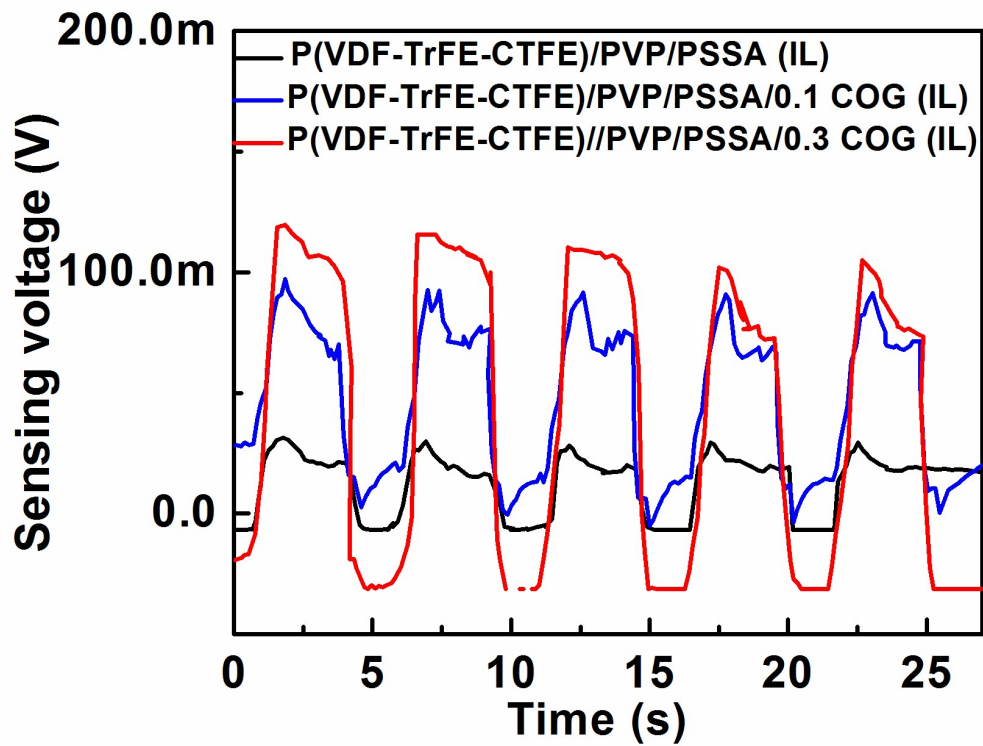

Fig. S5 Sensing voltage of the P(VDF-TrFE-CTFE)/PVP/PSSA (ionic liquid (IL)),P(VDF-TrFE-CTFE)/PVP/PSSA (ionic liquid (IL)),(0.1 COG),P(VDF-TrFE-CTFE)/PVP/PSSA (ionic liquid (IL)),( 0.3 COG).

For comparison of sensing voltage of ionic liquid embedded P(VDF-TrFE-CTFE) with previous work of polyelectrolyte and carboxylic graphene attached P(VDF-TrFE-CTFE) for energy harvesting, the sensing voltage of the P(VDF-TrFE-CTFE)/PVP/PSSA and P(VDF-TrFE-CTFE)/PVP/PSSA/carboxylic graphene are shown in Fig. S5.

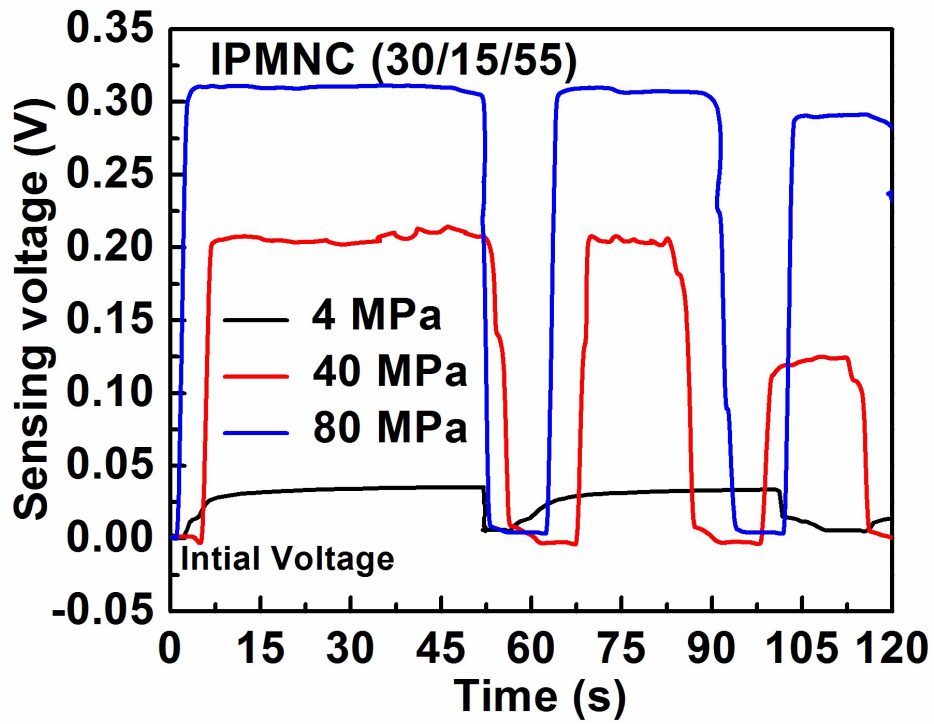

Fig. S 6 Sensing voltage of the 30/15/55 with a time at 4, 40, and 80 MPa

The IPMNC 30/15/55 displayed high sensing voltage of the 0.3 Volt with the fast response time. In addition, sensing voltage variation of IPMNC 30/15/55 with time is shown in Fig. S6 at different pressure of 4 MPa, 40 MPa, and 80 MPa.
